# Supplementary material for: Gas–particle partitioning of m -xylene and naphthalene oxidation products: temperature and NO x influence
Source: Copernicus journal article supplement (doi:10.5194/acp-25-10267-2025), 2025-09-10
Supplement: Supplementary file 1 [file acp-25-10267-2025-supplement.pdf]

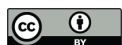

*Supplement of*

## **Gas–particle partitioning of *m*-xylene and naphthalene oxidation products: temperature and NO<sub>x</sub> influence**

**Marwa Shahin et al.**

*Correspondence to:* Marwa Shahin ([marwa.shahin@etu.univ-amu.fr](mailto:marwa.shahin@etu.univ-amu.fr)) and Barbara D'Anna ([barbara.danna@univ-amu.fr](mailto:barbara.danna@univ-amu.fr))

The copyright of individual parts of the supplement might differ from the article licence.

## Supplementary method

### Calculation of the carbon balance

The carbon balance was calculated by comparing the total carbon content of detected reaction products to the amount of carbon from the reacted precursor VOCs, with all quantities expressed in units of ppbC. First, the amount of precursor carbon reacted was determined by:

$$\text{reacted carbon (ppbC)} = \Delta[\text{VOC}] (\text{ppb}) \times n_c$$

where  $\Delta[\text{VOC}]$  is the decrease in the VOC concentration due to its reaction, and  $n_c$  is the number of carbon atoms per molecule (8 for m-xylene, 10 for naphthalene).

Second, the carbon content of all observed products was calculated by summing the contribution of each compound:

$$\text{product carbon (ppbC)} = \sum_i ([\text{product}_i] (\text{ppb}) \times n_{c,i})$$

where  $[\text{product}_i]$  is the measured mixing ratio and  $n_{c,i}$  is the carbon number of each compound  $i$ .

The carbon balance was then computed as:

$$\text{carbon balance (\%)} = \frac{\text{product carbon (ppbC)}}{\text{reacted carbon (ppbC)}} \times 100$$

This calculation assumes that all carbon is either retained in the measured gas-phase or particle-phase products or converted into undetected species. It does not account for potential carbon in undetected products (e.g., oligomers, extremely low volatility species), or known small carbon products such as CO, CO<sub>2</sub>, and glyoxal that we could not measure because of instrumental limitations.

### Calculation of the OH rate constant

The values of the temperature dependent OH rate constant are calculated based on Arrhenius equation as follows:

$$k_{OH}(T) = A \frac{T}{298(K)} e^{\frac{-E_a}{RT}}$$

where

- $k_{OH}(T)$  is the rate constant at temperature (T) [ $\text{cm}^3 \text{ molecule}^{-1} \text{ s}^{-1}$ ]
- T is the temperature [K]
- A is the pre-exponential factor
- R is the universal gas constant [ $8.413 \text{ J mol}^{-1} \text{ K}^{-1}$ ]
- $E_a$  is the activation energy [ $\text{J mol}^{-1}$ ]

The specific parameters were (taken from NIST Kinetic Database):

- m-xylene:  $A = 1.66 \times 10^{-11}$ ,  $E_a = -964 \text{ J mol}^{-1}$
- naphthalene:  $A = 1.05 \times 10^{-12}$ ,  $E_a = -7500 \text{ J mol}^{-1}$

### Calculation of the TSP

The SMPS measures number- and volume-based size distributions. In our analysis, we used the number concentration ( $\text{particles cm}^{-3}$ ) measured by the SMPS and converted it to mass concentration ( $\mu\text{g m}^{-3}$ ) by assuming spherical particles and applying the standard geometric volume formula for each size bin. Each calculated particle volume was then multiplied by the assumed composition-specific density to determine mass. Specifically, the densities used were:  $1.0 \text{ g cm}^{-3}$  for water,  $1.4 \text{ g cm}^{-3}$  for organics, and  $1.7 \text{ g cm}^{-3}$  for ammonium, sulfate and nitrate. The percentage of each chemical fraction for each experiment was inferred from AMS measurements, and the corresponding weighted average density was applied to the SMPS volume distribution to obtain TSP. This approach provided a more accurate representation of the aerosol mass.

46 **Table S1. List of laboratory experiments conducted by Ng et al. (2007), Chen et al. (2018), Song et al. (2007), Chen et**  
47 **al. (2016) Chen et al. (2009), and their associated environmental conditions, such as chamber temperature, RH,**  
48 **VOC/NO<sub>x</sub> ratio, seeds mass and SOA yields.**

|                    | <i>T</i> | <i>RH</i> | <i>VOC</i>                   | <i>NO<sub>x</sub></i> | <i>VOC/NO<sub>x</sub></i> | <i>Seeds</i>       | <i>[OH]</i>                | <i>ΔVOC</i>        | <i>ΔM<sub>0</sub></i> | <i>Y</i> |
|--------------------|----------|-----------|------------------------------|-----------------------|---------------------------|--------------------|----------------------------|--------------------|-----------------------|----------|
|                    | K        | %         | ppbV                         | ppb                   | ppbC ppb <sup>-1</sup>    | μg m <sup>-3</sup> | molecules cm <sup>-3</sup> | μg m <sup>-3</sup> | μg m <sup>-3</sup>    | %        |
| Ng et al. (2007)   | 297      | 6         | 42-172                       | 943                   | high NO <sub>x</sub>      | AS                 |                            | 71                 | 18                    | 5.9      |
|                    | 298      | 6         | (not indicated for each exp) | 945                   | high NO <sub>x</sub>      | AS                 | from HONO                  | 28                 | 4                     | 3.5      |
|                    | 298      | 6         |                              | 943                   | high NO <sub>x</sub>      | AS                 |                            | 133                | 46                    | 8        |
|                    | 297      | 5         |                              | 945                   | high NO <sub>x</sub>      | AS                 |                            | 106                | 37                    | 8        |
| Chen et al. (2018) | 300      | <0.1      | 44                           | 8                     | high NO <sub>x</sub>      | none               | 3.04E+06                   | 159                | 4.8                   | 3        |
|                    | 300      | <0.1      | 59                           | 11.5                  | high NO <sub>x</sub>      | none               | 2.79E+06                   | 201                | 11.6                  | 6        |
| Song et al. (2007) | 300      | <0.1      | 104                          | -                     | low NO <sub>x</sub>       | none               | 0.55E+06                   | 193                | 17.3                  | 8.9      |
|                    | 300      | <0.1      | 112                          | -                     | low NO <sub>x</sub>       | none               | 0.84E+06                   | 227                | 38                    | 16.7     |
|                    | 300      | <0.1      | 51                           | -                     | low NO <sub>x</sub>       | none               | 0.80E+06                   | 113                | 20                    | 17.7     |
|                    | 300      | <0.1      | 39                           | -                     | low NO <sub>x</sub>       | none               | 1.05E+06                   | 97                 | 11.9                  | 12.3     |
|                    | 300      | <0.1      | 52                           | -                     | low NO <sub>x</sub>       | none               | 1.29E+06                   | 147                | 45                    | 30.6     |
|                    | 300      | <0.1      | 46                           | -                     | low NO <sub>x</sub>       | none               | 1.18E+06                   | 124                | 25                    | 20.6     |
| Chen et al. (2016) | RT       | <0.1      | 45                           | 698                   | high NO <sub>x</sub>      | none               |                            | 168                | 94.8                  | 60       |
|                    | RT       | <0.1      | 29                           | 776                   | high NO <sub>x</sub>      | none               |                            | 126                | 59.4                  | 47       |
|                    | RT       | <0.1      | 26                           | 758                   | high NO <sub>x</sub>      | none               | from HONO                  | 116                | 47.1                  | 41       |
|                    | RT       | <0.1      | 30                           | 776                   | high NO <sub>x</sub>      | none               |                            | 105                | 3                     | 3        |
|                    | RT       | <0.1      | 23                           | 783                   | high NO <sub>x</sub>      | none               |                            | 80                 | 20.3                  | 25       |
|                    | RT       | <0.1      | 28                           | 22                    | low NO <sub>x</sub>       | none               |                            | 135                | 5.7                   | 4        |
|                    | RT       | <0.1      | 15                           | 13                    | low NO <sub>x</sub>       | none               |                            | 76                 | 21.1                  | 28       |
|                    | RT       | <0.1      | 27                           | 19                    | low NO <sub>x</sub>       | none               |                            | 140                | 30.8                  | 22       |
|                    | RT       | <0.1      | 35                           | 10                    | low NO <sub>x</sub>       | none               |                            | 173                | 50.1                  | 29       |
|                    | RT       | <0.1      | 29                           | 18                    | low NO <sub>x</sub>       | none               |                            | 142                | 27.1                  | 19       |
|                    | RT       | <0.1      | 17                           | 11                    | low NO <sub>x</sub>       | none               | from HONO                  | 84                 | 26.2                  | 31       |
|                    | RT       | <0.1      | 17                           | 14                    | low NO <sub>x</sub>       | 17.3               |                            | 86                 | 15.5                  | 18       |
|                    | RT       | <0.1      | 16                           | 21                    | low NO <sub>x</sub>       | 41.9               |                            | 77                 | 9.7                   | 13       |
|                    | RT       | <0.1      | 27                           | 18                    | low NO <sub>x</sub>       | 15.4               |                            | 125                | 34.5                  | 28       |
|                    | RT       | <0.1      | 15                           | 10                    | low NO <sub>x</sub>       | 3.4                |                            | 69                 | 22.7                  | 33       |

|                       |     |     |    |     |                      |    |           |    |      |    |
|-----------------------|-----|-----|----|-----|----------------------|----|-----------|----|------|----|
| Chan et al.<br>(2009) | 299 | 5-8 | 12 | 494 | high NO <sub>x</sub> | AS |           | 59 | 10.9 | 19 |
|                       | 299 | 5-8 | 21 | 377 | high NO <sub>x</sub> | AS |           | 93 | 27.7 | 30 |
|                       | 299 | 5-8 | 10 | 424 | high NO <sub>x</sub> | AS | from HONO | 40 | 8    | 20 |
|                       | 299 | 5-8 | 17 | 477 | high NO <sub>x</sub> | AS |           | 65 | 13.6 | 21 |
|                       | 299 | 5-8 | 17 | 477 | high NO <sub>x</sub> | AS |           | 84 | 22.8 | 27 |

Table S2. Derived and estimated  $\log_{10}Ci^*$  values for m-xylene products

| Carbon number | Measured m/z and ion sum formula                                       | Tentative assignment                  | SMILES string                              | Derived values           |                          |                       | Estimated values         |                          |                       |
|---------------|------------------------------------------------------------------------|---------------------------------------|--------------------------------------------|--------------------------|--------------------------|-----------------------|--------------------------|--------------------------|-----------------------|
|               |                                                                        |                                       |                                            | $\log_{10}Ci^*$ at 295 K | $\log_{10}Ci^*$ at 280 K | $\Delta\log_{10}Ci^*$ | $\log_{10}Ci^*$ at 295 K | $\log_{10}Ci^*$ at 280 K | $\Delta\log_{10}Ci^*$ |
| 8             | 121.06 (C <sub>8</sub> H <sub>8</sub> O).H <sup>+</sup>                | tolualdehyde                          | <chem>CC1=CC(=CC=C1)C=O</chem>             | 3.72                     | 3.66                     | 0.06                  | 6.03                     | 5.65                     | 0.38                  |
| 8             | 171.07 (C <sub>8</sub> H <sub>10</sub> O <sub>4</sub> ).H <sup>+</sup> | dimethyl-hexadienedioic acid          | <chem>C/C(=C\C(=O)O)/C=C(\C)/C(=O)O</chem> | 1.12                     | 0.83                     | 0.30                  | 0.87                     | 0.30                     | 0.58                  |
|               |                                                                        | dihydroxy-dimethyl-cyclohexene-dione  | <chem>CC1=CC(=O)C(C(C1=O)(C)O)O</chem>     |                          |                          |                       | 0.78                     | 0.21                     | 0.58                  |
| 8             | 153.06 (C <sub>8</sub> H <sub>8</sub> O <sub>3</sub> ).H <sup>+</sup>  | hydroxy-methylbenzoic acid            | <chem>Cc1cccc(C(=O)O)c1O</chem>            | 2.19                     | 2.07                     | 0.12                  | 1.78                     | 1.29                     | 0.49                  |
| 8             | 187.06 (C <sub>8</sub> H <sub>10</sub> O <sub>5</sub> ).H <sup>+</sup> | oxo-cyclohexane-dicarboxylic acid     | <chem>C1C(CC(=O)CC1C(=O)O)C(=O)O</chem>    | 0.78                     | 0.69                     | 0.09                  | 0.19                     | -0.45                    | 0.64                  |
|               |                                                                        | hydroxy-cyclohexene-dicarboxylic acid | <chem>C(C(=O)O)1C(C(O)=O)CC=CC1O</chem>    |                          |                          |                       | -1.19                    | -1.95                    | 0.76                  |
| 7             | 141.05 (C <sub>7</sub> H <sub>8</sub> O <sub>3</sub> ).H <sup>+</sup>  | oxohepta-dienoic acid                 | <chem>CC(=O)/C=C/C=C/C(=O)O</chem>         | 1.74                     | 1.41                     | 0.33                  | 3.86                     | 3.33                     | 0.53                  |
| 7             | 154.05 (C <sub>7</sub> H <sub>7</sub> NO <sub>3</sub> ).H <sup>+</sup> | nitroresol                            | <chem>Cc1c(cccc1O)[N+](=O)[O-]</chem>      | 2.51                     | 2.39                     | 0.12                  | 5.83                     | 5.37                     | 0.46                  |
| 6             | 127.04 (C <sub>6</sub> H <sub>6</sub> O <sub>3</sub> ).H <sup>+</sup>  | dimethyl furandione                   | <chem>CC1=C(C)C(=O)OC1=O</chem>            | 1.95                     | 1.79                     | 0.17                  | 5.46                     | 5.06                     | 0.40                  |
| 6             | 129.06 (C <sub>6</sub> H <sub>8</sub> O <sub>3</sub> ).H <sup>+</sup>  | hydroxy-dioxohexanal                  | <chem>CC(=O)C(O)CC(=O)C=O</chem>           | 1.73                     | 1.31                     | 0.43                  | 3.58                     | 3.07                     | 0.52                  |
|               |                                                                        | methyl-oxo-pentenoic acid             | <chem>CC(=CC(=O)O)C(=O)C</chem>            |                          |                          |                       | 4.36                     | 3.87                     | 0.49                  |
| 5             | 113.02 (C <sub>5</sub> H <sub>4</sub> O <sub>3</sub> ).H <sup>+</sup>  | methylfuran-dione                     | <chem>CC1=CC(=O)OC1=O</chem>               | 3.45                     | 3.11                     | 0.34                  | 5.85                     | 5.46                     | 0.39                  |
| 5             | 131.04 (C <sub>5</sub> H <sub>6</sub> O <sub>4</sub> ).H <sup>+</sup>  | hydroxy-methyl-oxosuccinaldehyde      | <chem>CC(C=O)(C(=O)C=O)O</chem>            | 2.54                     | 2.13                     | 0.40                  | 3.55                     | 3.11                     | 0.43                  |
| 5             | 115.03 (C <sub>5</sub> H <sub>6</sub> O <sub>3</sub> ).H <sup>+</sup>  | oxopentenoic acid                     | <chem>C=CC(=O)CC(=O)O</chem>               | 2.14                     | 1.72                     | 0.41                  | 4.74                     | 4.27                     | 0.47                  |
| 5             | 97.03 (C <sub>5</sub> H <sub>4</sub> O <sub>2</sub> ).H <sup>+</sup>   | furaldehyde (furfural)                | <chem>C1=COC(=C1)C=O</chem>                | 2.56                     | 2.27                     | 0.30                  | 6.52                     | 6.18                     | 0.34                  |
| 5             | 117.05 (C <sub>5</sub> H <sub>8</sub> O <sub>3</sub> ).H <sup>+</sup>  | oxo-pentanoic acid                    | <chem>CC(=O)CCC(=O)O</chem>                | 2.62                     | 2.00                     | 0.62                  | 4.85                     | 4.39                     | 0.46                  |
| 5             | 101.06 (C <sub>5</sub> H <sub>8</sub> O <sub>2</sub> ).H <sup>+</sup>  | oxo-pentanal                          | <chem>CC(=O)CCC=O</chem>                   | 1.99                     | 1.40                     | 0.59                  | 6.99                     | 6.64                     | 0.35                  |
| 4             | 71.05 (C <sub>4</sub> H <sub>6</sub> O).H <sup>+</sup>                 | dihydrofuran                          | <chem>C1COC=C1</chem>                      | 2.90                     | 2.26                     | 0.65                  | 8.75                     | 8.51                     | 0.24                  |
|               |                                                                        | MVK                                   | <chem>CC(=O)C=C</chem>                     |                          |                          |                       | 8.51                     | 8.24                     | 0.27                  |
|               |                                                                        | MAC                                   | <chem>CC(=C)C=O</chem>                     |                          |                          |                       | 8.10                     | 7.83                     | 0.26                  |
| 4             | 103.04 (C <sub>4</sub> H <sub>6</sub> O <sub>3</sub> ).H <sup>+</sup>  | hydroxy oxobutanal                    | <chem>C(CO)C(=O)C=O</chem>                 | 1.76                     | 0.84                     | 0.92                  | 5.23                     | 4.79                     | 0.44                  |
| 3             | 73.03 (C <sub>3</sub> H <sub>4</sub> O <sub>2</sub> ).H <sup>+</sup>   | methylglyoxal                         | <chem>CC(=O)C=O</chem>                     | 3.16                     | 2.69                     | 0.47                  | 7.72                     | 7.45                     | 0.27                  |

|   |                                                                      |                |          |      |      |      |      |      |      |
|---|----------------------------------------------------------------------|----------------|----------|------|------|------|------|------|------|
| 3 | 75.04 (C <sub>3</sub> H <sub>6</sub> O <sub>2</sub> ).H <sup>+</sup> | propanoic acid | CCC(=O)O | 3.26 | 3.06 | 0.20 | 6.45 | 6.10 | 0.35 |
|---|----------------------------------------------------------------------|----------------|----------|------|------|------|------|------|------|

51 Table S3. Derived and estimated  $\log_{10}C_i^*$  values for naphthalene products

| Carbon number | Measured m/z and ion sum formula                                        | Tentative assignment         | SMILES string                    | Derived values               |                              |                        | Estimated values             |                              |                        |
|---------------|-------------------------------------------------------------------------|------------------------------|----------------------------------|------------------------------|------------------------------|------------------------|------------------------------|------------------------------|------------------------|
|               |                                                                         |                              |                                  | $\log_{10}C_i^*$<br>at 295 K | $\log_{10}C_i^*$<br>at 280 K | $\Delta\log_{10}C_i^*$ | $\log_{10}C_i^*$<br>at 295 K | $\log_{10}C_i^*$<br>at 280 K | $\Delta\log_{10}C_i^*$ |
| 10            | 161.06 (C <sub>10</sub> H <sub>8</sub> O <sub>2</sub> ).H <sup>+</sup>  | formyl cinnamaldehyde        | C1=CC=C(C(=C1)/C=C/C=O)C=O       | 1.91                         | 1.20                         | 0.71                   | 3.85                         | 3.25                         | 0.60                   |
| 10            | 193.05 (C <sub>10</sub> H <sub>8</sub> O <sub>4</sub> ).H <sup>+</sup>  | carboxy cinnamic acid        | O=C(O)/C=C/c1cccc1C(=O)O         | 1.28                         | 1.15                         | 0.13                   | -0.52                        | -1.17                        | 0.65                   |
| 10            | 159.04 (C <sub>10</sub> H <sub>6</sub> O <sub>2</sub> ).H <sup>+</sup>  | naphthoquinone               | c1ccc2c(c1)C(=O)C=CC2=O          | 2.61                         | 1.79                         | 0.82                   | 4.65                         | 4.16                         | 0.49                   |
| 10            | 177.05 (C <sub>10</sub> H <sub>8</sub> O <sub>3</sub> ).H <sup>+</sup>  | formyl cinnamic acid         | O=Cc1cccc1/C=C/C(=O)O            | 1.44                         | 1.24                         | 0.20                   | 1.66                         | 1.07                         | 0.60                   |
| 10            | 175.04 (C <sub>10</sub> H <sub>6</sub> O <sub>3</sub> ).H <sup>+</sup>  | epoxy-naphthoquinone         | C1=CC=CC2C(=O)C3OC3C(=O)C1=2     | 1.82                         | 1.68                         | 0.14                   | 4.12                         | 3.54                         | 0.58                   |
| 10            | 145.07 (C <sub>10</sub> H <sub>8</sub> O).H <sup>+</sup>                | naphthol                     | c1ccc2c(c1)ccc2O                 | 1.75                         | 1.21                         | 0.54                   | 3.78                         | 3.28                         | 0.50                   |
| 10            | 191.04 (C <sub>10</sub> H <sub>6</sub> O <sub>4</sub> ).H <sup>+</sup>  | dihydroxy naphthoquinone     | C1=C(O)C(O)=CC2C(=O)C=CC(=O)C1=2 | 1.81                         | 1.66                         | 0.15                   | 0.49                         | -0.25                        | 0.74                   |
| 10            | 195.06 (C <sub>10</sub> H <sub>10</sub> O <sub>4</sub> ).H <sup>+</sup> | phenylenediacetic acid       | c1ccc(c(c1)CC(=O)O)CC(=O)O       | 1.79                         | 1.50                         | 0.29                   | -0.41                        | -1.05                        | 0.64                   |
|               |                                                                         | carboxybenzenepropanoic acid | c1ccc(c(c1)CCC(=O)O)C(=O)O       |                              |                              |                        | -0.42                        | -1.04                        | 0.63                   |
| 10            | 174.05 (C <sub>10</sub> H <sub>7</sub> NO <sub>2</sub> ).H <sup>+</sup> | nitronaphthalene             | c1ccc2c(c1)ccc2[N+](=O)[O-]      | 3.07                         | 2.32                         | 0.75                   | 3.85                         | 3.37                         | 0.48                   |
| 10            | 190.05 (C <sub>10</sub> H <sub>7</sub> NO <sub>3</sub> ).H <sup>+</sup> | nitronaphthol                | c1ccc2c(c1)c(ccc2O)[N+](=O)[O-]  | 1.81                         | 1.58                         | 0.23                   | 3.94                         | 3.38                         | 0.55                   |
| 9             | 147.05 (C <sub>9</sub> H <sub>6</sub> O <sub>2</sub> ).H <sup>+</sup>   | benzopyrone (coumarin)       | c1ccc2c(c1)ccc(=O)o2             | 2.16                         | 1.60                         | 0.56                   | 5.16                         | 4.67                         | 0.49                   |
|               |                                                                         | indene-dione                 | c1ccc2c(c1)C(=O)CC2=O            |                              |                              |                        | 5.16                         | 4.66                         | 0.50                   |
| 9             | 163.04 (C <sub>9</sub> H <sub>6</sub> O <sub>3</sub> ).H <sup>+</sup>   | hydroxycoumarin              | c1ccc2c(c1)c(cc(=O)o2)O          | 1.90                         | 1.75                         | 0.15                   | 3.08                         | 2.50                         | 0.58                   |
| 9             | 133.06 (C <sub>9</sub> H <sub>8</sub> O).H <sup>+</sup>                 | indanone                     | c1ccc2c(c1)CCC2=O                | 2.63                         | 1.63                         | 1.00                   | 5.37                         | 4.94                         | 0.44                   |
| 9             | 179.04 (C <sub>9</sub> H <sub>6</sub> O <sub>4</sub> ).H <sup>+</sup>   | dihydroxy-indene-dione       | C1=CC=CC2C(=O)C(O)(O)C(=O)C1=2   | 1.63                         | 0.54                         | 1.08                   | 3.05                         | 2.35                         | 0.69                   |
| 9             | 165.06 (C <sub>9</sub> H <sub>8</sub> O <sub>3</sub> ).H <sup>+</sup>   | hydroxy cinnamic acid        | c1ccc(c(c1)/C=C/C(=O)O)O         | 2.05                         | 1.61                         | 0.44                   | 1.28                         | 0.70                         | 0.58                   |
| 9             | 181.05 (C <sub>9</sub> H <sub>8</sub> O <sub>4</sub> ).H <sup>+</sup>   | dihydroxycinnamic acid       | C1=CC(O)=CC(/C=C/C(=O)O)=C1O     | 1.64                         | 1.41                         | 0.23                   | -0.80                        | -1.51                        | 0.70                   |

|   |                                                                        |                        |                                     |      |      |      |      |      |      |
|---|------------------------------------------------------------------------|------------------------|-------------------------------------|------|------|------|------|------|------|
| 8 | 135.05 (C <sub>8</sub> H <sub>6</sub> O <sub>2</sub> ).H <sup>+</sup>  | phthaldialdehyde       | <chem>O=Cc1ccccc1C=O</chem>         | 3.32 | 2.16 | 1.06 | 4.73 | 4.27 | 0.46 |
| 8 | 149.03 (C <sub>8</sub> H <sub>4</sub> O <sub>3</sub> ).H <sup>+</sup>  | phthalic anhydride     | <chem>c1ccc2c(c1)C(=O)OC2=O</chem>  | 3.16 | 2.76 | 0.39 | 5.10 | 4.62 | 0.49 |
| 8 | 151.04 (C <sub>8</sub> H <sub>6</sub> O <sub>3</sub> ).H <sup>+</sup>  | hydroxy phthalide      | <chem>C1=CC=CC(C(=O)O)=C1C=O</chem> | 2.11 | 1.50 | 0.61 | 2.57 | 2.02 | 0.55 |
|   |                                                                        | hydroxy phthalaldehyde | <chem>C1=CC(O)=CC(C=O)=C1C=O</chem> |      |      |      | 2.65 | 2.11 | 0.54 |
| 6 | 115.07 (C <sub>6</sub> H <sub>10</sub> O <sub>2</sub> ).H <sup>+</sup> | dimethyloxolanone      | <chem>CC1CC(OC1=O)C</chem>          | 3.24 | 2.40 | 0.84 | 7.73 | 7.33 | 0.40 |
|   |                                                                        | hexanedione            | <chem>CC(=O)CCC(=O)C</chem>         |      |      |      | 7.03 | 6.65 | 0.38 |

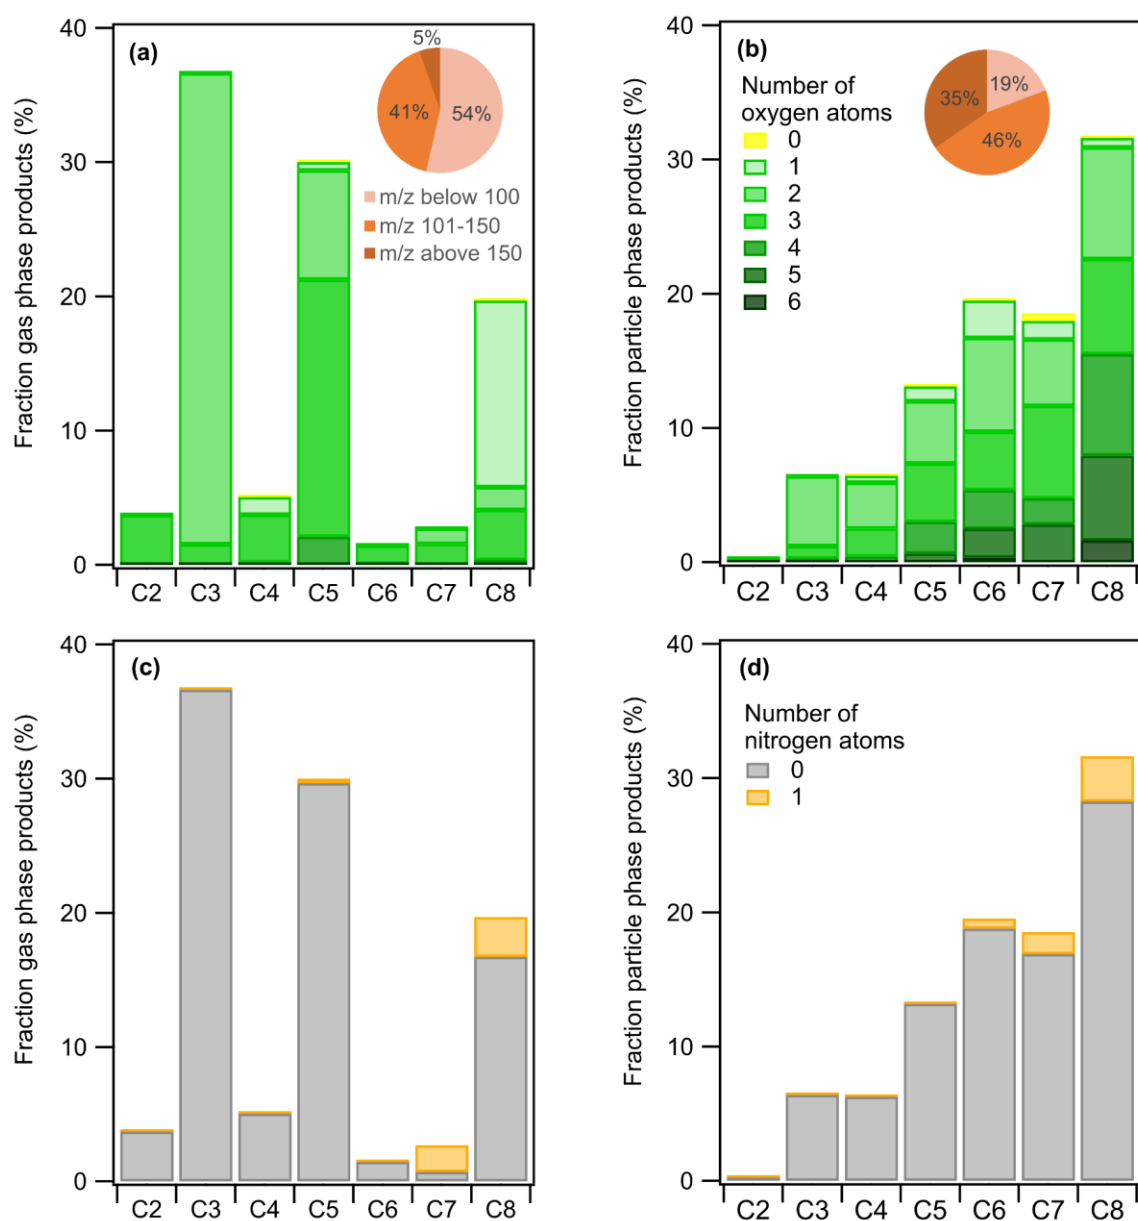

Figure S1. m-xylene mass products fraction (y-axis) distribution based on the number of carbon atoms (x-axis) for a high NO<sub>x</sub> experiment 295 K, colored by the number of (a,b) oxygen and (c,d) nitrogen atoms. Detected compounds are in the (a,c) gas phase and (b,d) particle phase. Pie charts correspond to the molecular weight contribution to the overall mass.



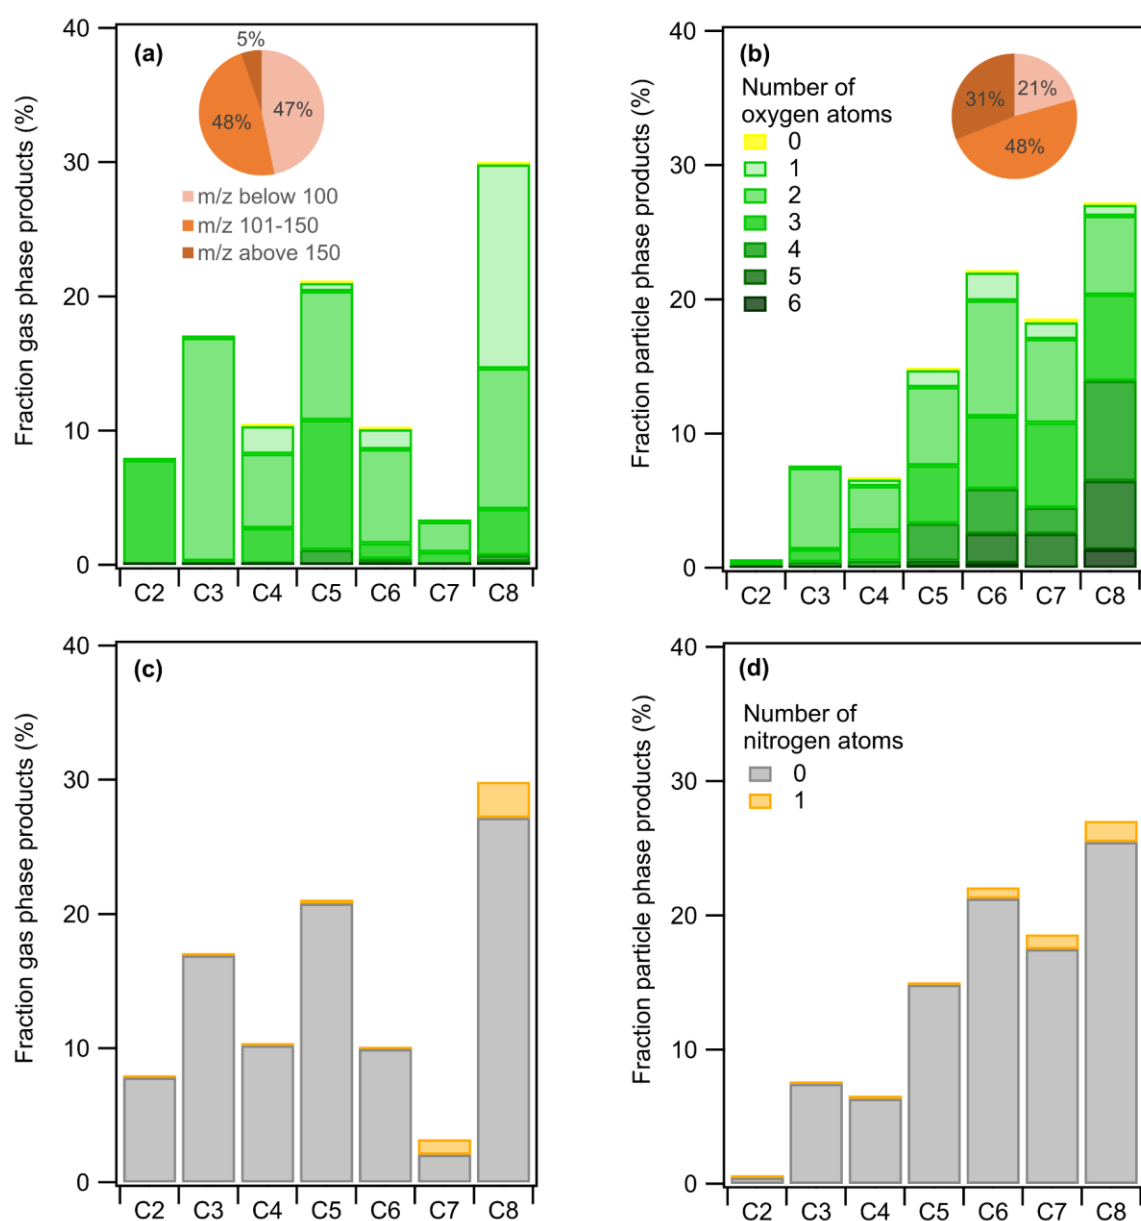

Figure S2. m-xylene mass products fraction (y-axis) distribution based on the number of carbon atoms (x-axis) for a low NO<sub>x</sub> experiment 295 K, colored by the number of (a,b) oxygen and (c,d) nitrogen atoms. Detected compounds are in the (a,c) gas phase and (b,d) particle phase. Pie charts correspond to the molecular weight contribution to the overall mass.

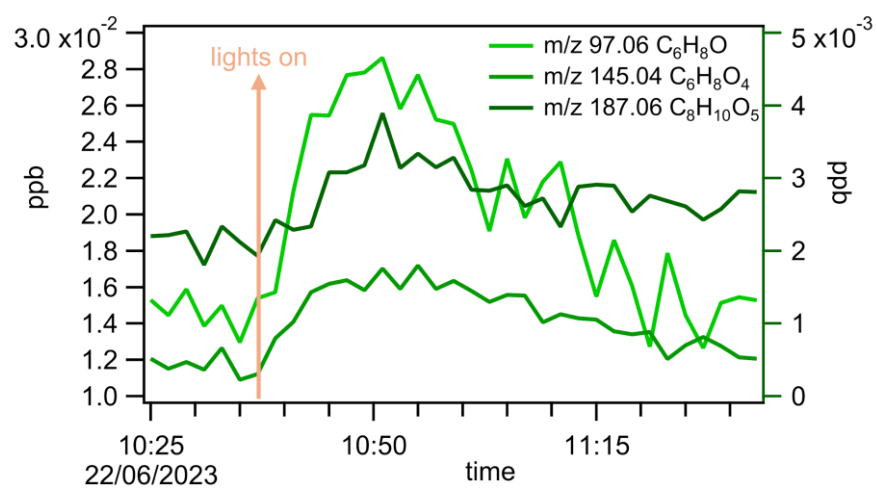

63

64 **Figure S3. Time evolution of some C<sub>6</sub> and C<sub>8</sub> compounds in the gas phase at 295 K high NO<sub>x</sub> experiment upon**  
 65 **starting oxidation in the flow tube.**

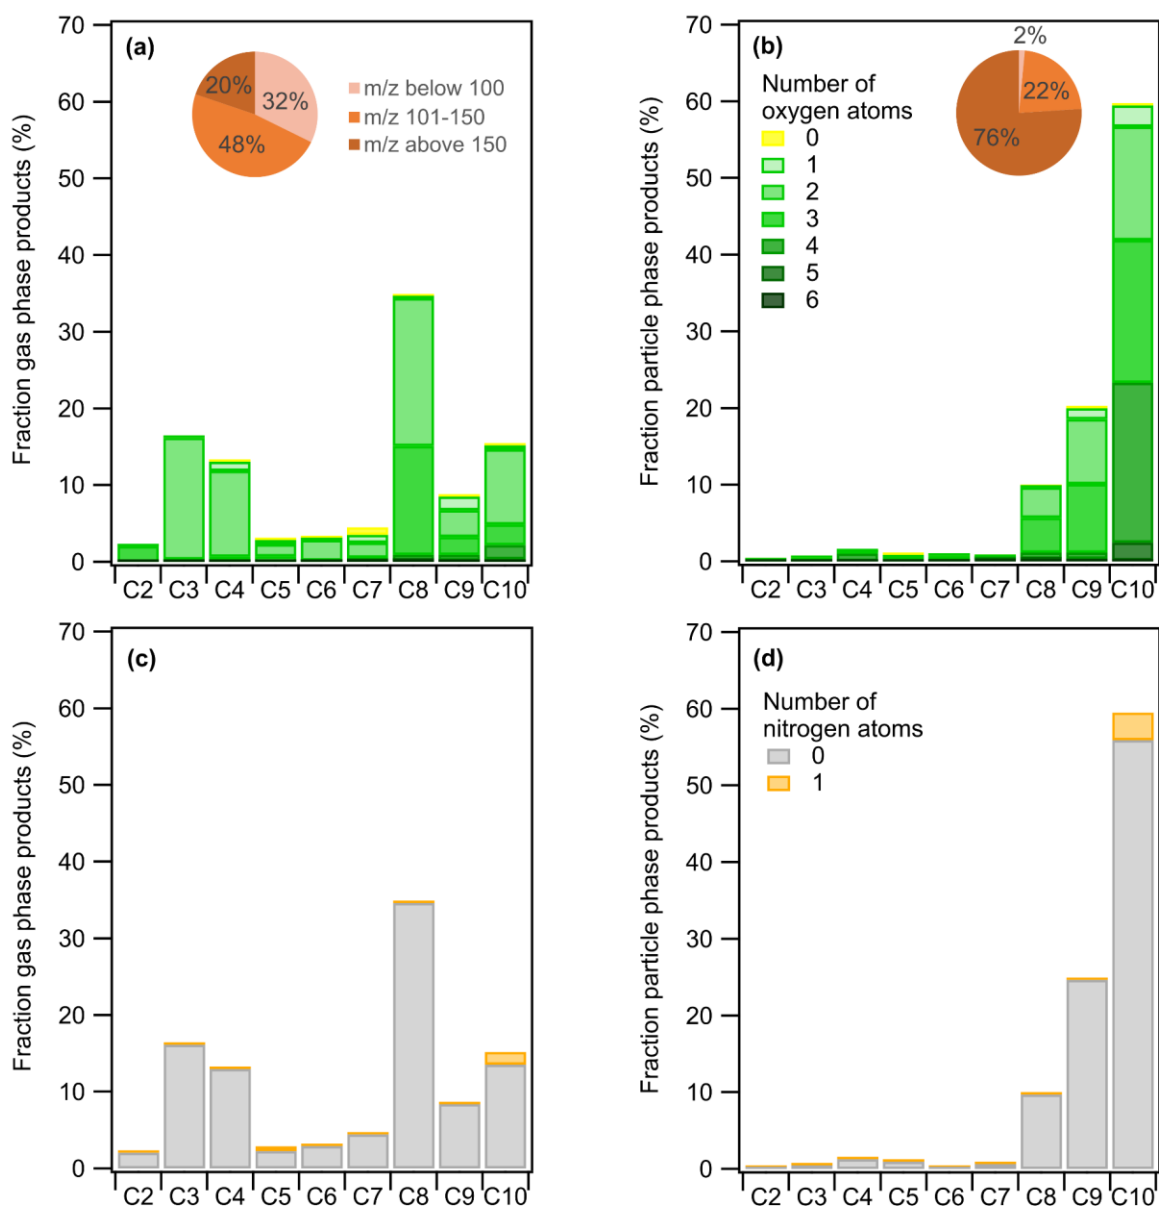

Figure S4. Naphthalene mass products fraction (y-axis) distribution based on the number of carbon atoms (x-axis) for a high NO<sub>x</sub> experiment 295 K, colored by the number of (a,b) oxygen and (c,d) nitrogen atoms. Detected compounds are in the (a,c) gas phase and (b,d) particle phase. Pie charts correspond to the molecular weight contribution to the overall mass.

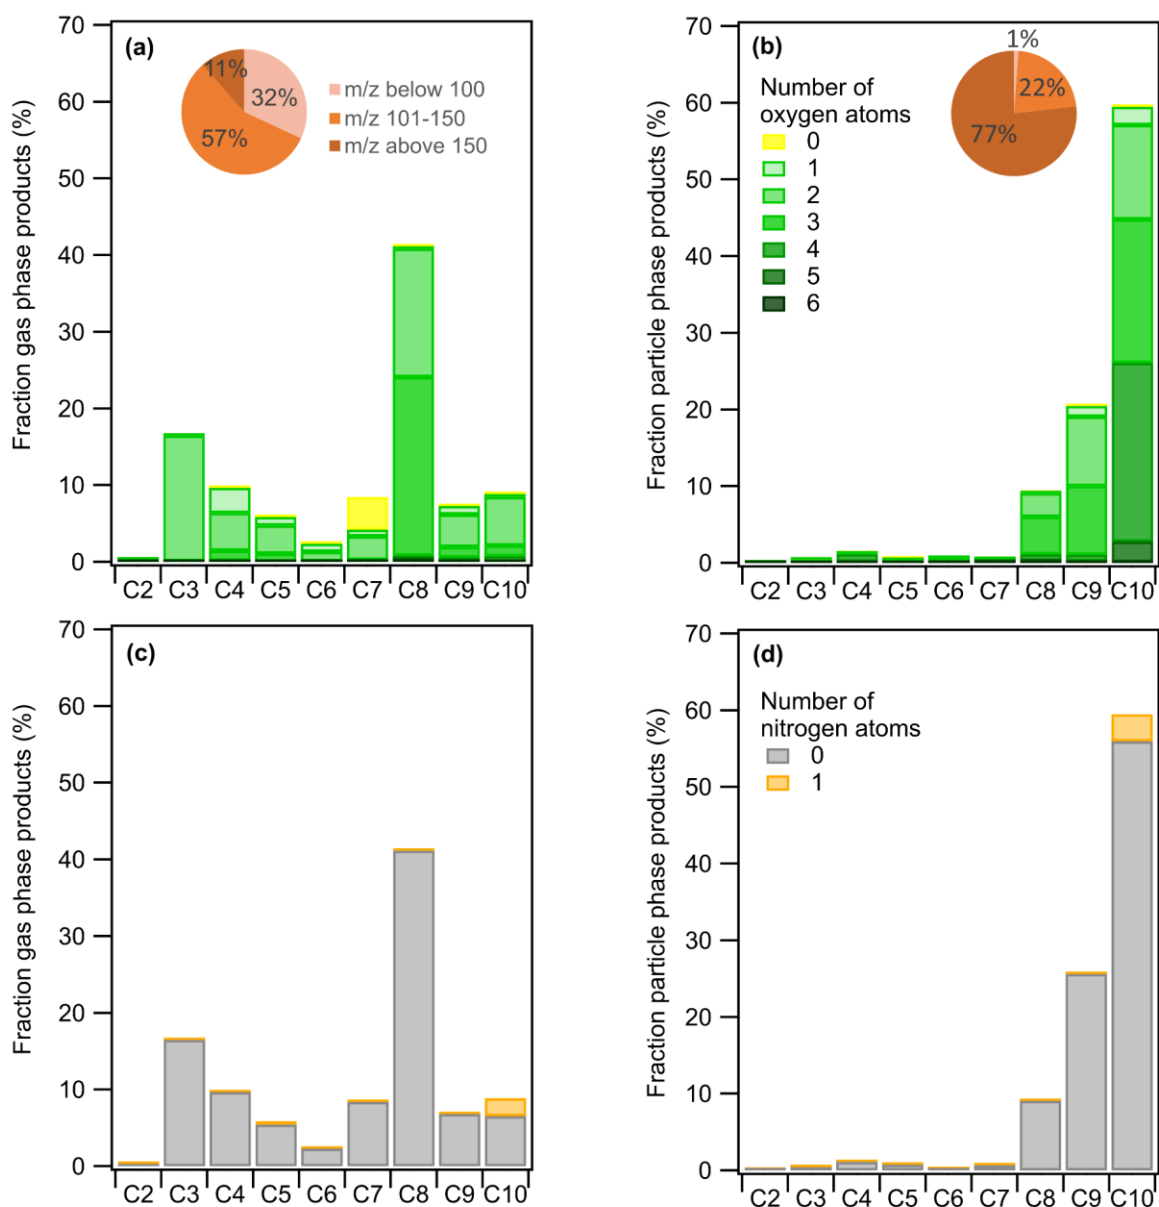

Figure S5. Naphthalene mass products fraction (y-axis) distribution based on the number of carbon atoms (x-axis) for a low NO<sub>x</sub> experiment 295 K, colored by the number of (a,b) oxygen and (c,d) nitrogen atoms. Detected compounds are in the (a,c) gas phase and (b,d) particle phase. Pie charts correspond to the molecular weight contribution to the overall mass.

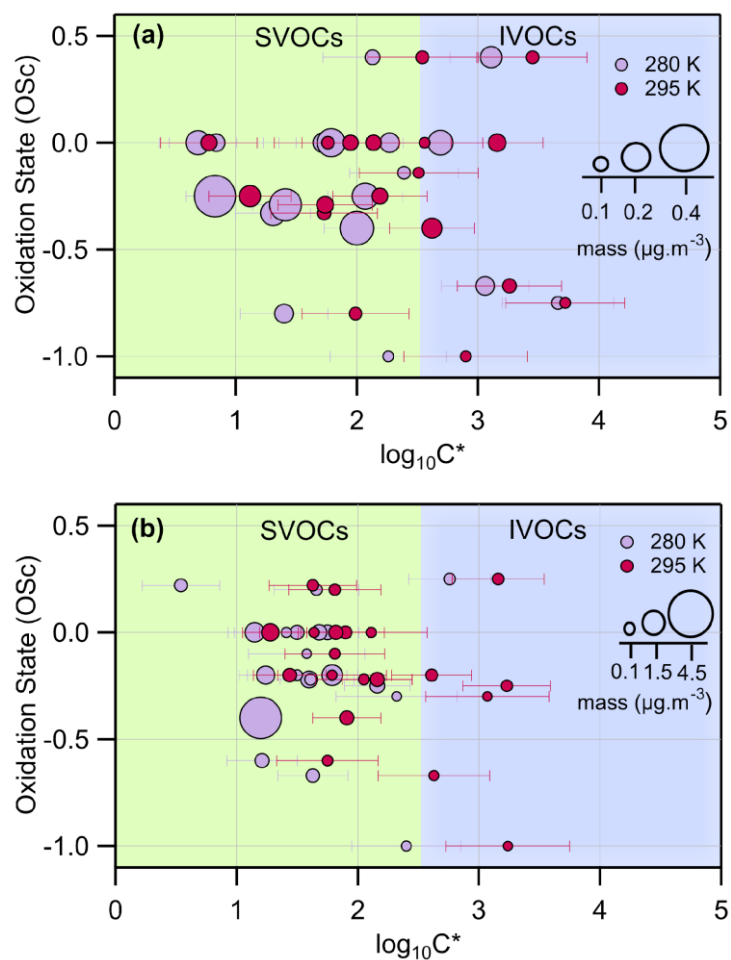

**Figure S6.** The OSc (y-axis) for the detected parent ions of (a) m-xylene and (b) naphthalene photooxidation, respectively, as a function of saturation concentration ( $\log_{10}C^*$  in  $\mu\text{g m}^{-3}$ ; x-axis) for high  $\text{NO}_x$  experiments. The size of the circles denotes the mass of each species. Experiments carried out at 280 K are in light violet while the ones carried out at 295 K are in magenta.

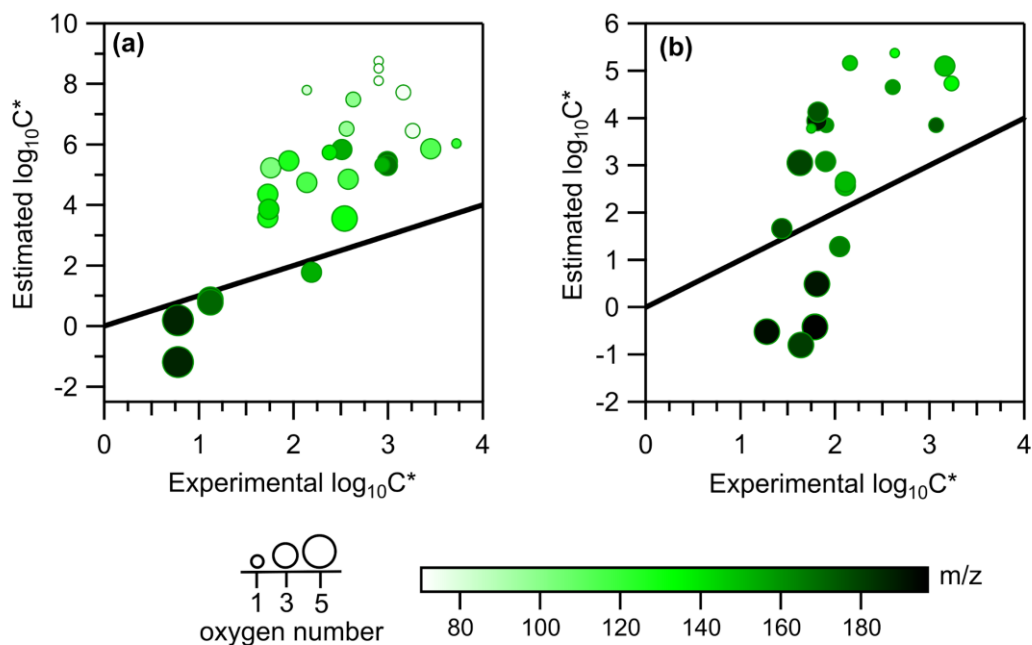

82

83 Figure S7. Theoretical (y-axis) versus experimental  $\log_{10}C_i^*$  values (x-axis) for (a) m-xylene and (b) naphthalene  
 84 oxidation products at 295 K under high  $\text{NO}_x$  conditions. The black line is the 1:1 fit. The size of the markers is  
 85 proportional to the oxygen number. The color gradient corresponds to  $m/z$  of the detected compounds.

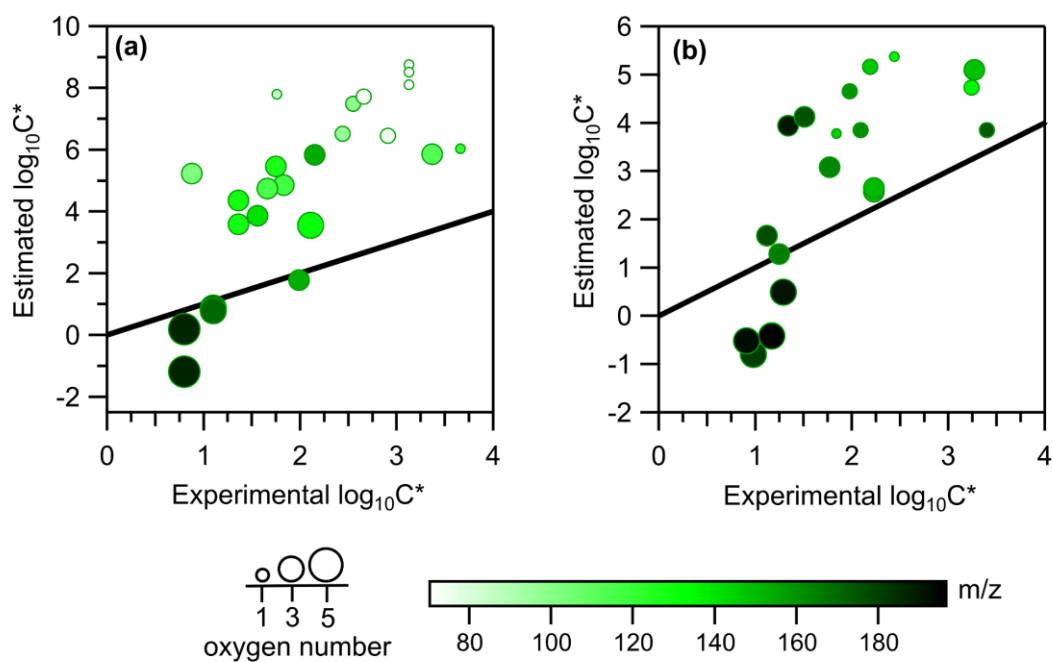

86

87 Figure S8. Theoretical (y-axis) versus experimental  $\log_{10}C_i^*$  values (x-axis) for (a) m-xylene and (b) naphthalene  
 88 oxidation products at 295 K under low  $\text{NO}_x$  conditions. The black line is the 1:1 fit. The size of the markers is  
 89 proportional to the oxygen number. The color gradient corresponds to  $m/z$  of the detected compounds.

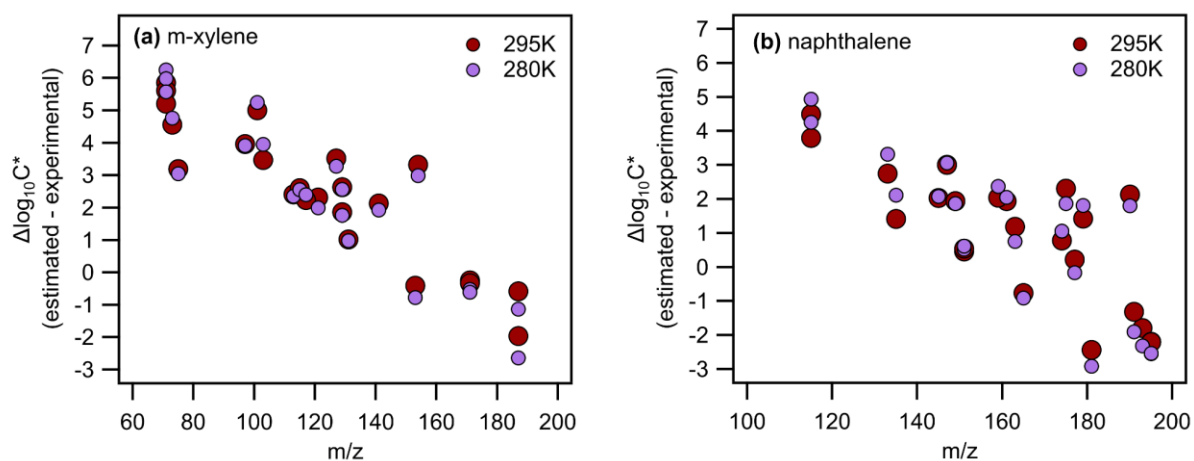

Figure S9.  $\Delta \log_{10} C_i^*$  ( $\log_{10} C_i^*$  Estimated minus  $\log_{10} C_i^*$  Experimental; y-axis) versus  $m/z$  (x-axis) for (a) m-xylene and (b) naphthalene oxidation products under high NO<sub>x</sub> conditions, at 295 K (magenta) and 280 K (light violet).
